# Supplementary material
Source: HighWire-hosted journal article supplement (https://bmjopen.bmj.com/content/10/7/e035014)
Supplement: inline-supplementary-material-1 [file inline-supplementary-material-1.pdf]

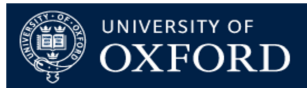

## CONSENT FORM (PEP-TALK STUDY)

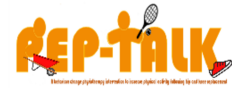

Name of Local Principal Investigator: \_\_\_\_\_

Screening Number:   -

LOCAL TRUST LOGO

**If you agree, please initial**

|                                                                                                                                                                                                                                                                                                                                                       |  |
|-------------------------------------------------------------------------------------------------------------------------------------------------------------------------------------------------------------------------------------------------------------------------------------------------------------------------------------------------------|--|
| 1. I confirm that I have read and understood the Information Leaflet dated 10 October 2019 version 4.0. I have had the opportunity to consider the information, ask questions and have had these answered satisfactorily.                                                                                                                             |  |
| 2. I understand that my participation is voluntary and that I am free to withdraw at any time without giving any reason, and without my medical care or legal rights being affected.                                                                                                                                                                  |  |
| 3. I understand that relevant sections of my medical notes and data collected during the study may be looked at by individuals from the University of Oxford, from regulatory authorities [and from the NHS Trust(s)], where it is relevant to me taking part in this research. I give permission for these individuals to have access to my records. |  |
| 4. I consent to the research team holding my contact details so that they can contact me about the study. I understand these details will be held securely and destroyed at the end of the study.                                                                                                                                                     |  |
| 5. I am aware that treatment sessions may be observed for quality assurance purposes.                                                                                                                                                                                                                                                                 |  |
| 6. I agree to my General Practitioner (GP) being informed of my participation in the study and questionnaire results.                                                                                                                                                                                                                                 |  |
| 7. I agree to be contacted for the purposes of follow up by the central PEP-TALK team who are based in Oxford.                                                                                                                                                                                                                                        |  |
| 8. I agree to take part in the PEP-TALK study.                                                                                                                                                                                                                                                                                                        |  |

Name of Participant

Date

Signature

Name of Person Taking Consent

Date

Signature

### STUDY RESULTS – THIS SECTION IS OPTIONAL TO COMPLETE

I agree to be contacted about ethically approved research studies for which I may be suitable. I understand that agreeing to be contacted does not oblige me to participate in any further studies.

YES  NO
